# Supplementary material for: Determination of reference genes as a quantitative standard for gene expression analysis in mouse mesangial cells stimulated with TGF-β
Source: Sci Rep. 2022 Sep 17;12:15626. doi: 10.1038/s41598-022-19548-z (PMC9482652; doi:10.1038/s41598-022-19548-z)
Supplement: Supplementary file 1 — Supplementary Table 1. [file 41598_2022_19548_MOESM1_ESM.xlsx]

## Sheet: Planilha1
Supplementary Table 1. Ranking of the housekeeping genes for each group of samples determined by software analyses.
Groups	NormFinder	SD	GeNorm	M value	RefFinder	Geomean	∆Ct method	Mean SD	Bestkeeper	CV	SD	DataAssist	Score
All	Ppia	0.15	Hprt	1.06	Ppia	1.73	Ppia	1.47	18S	2.83	0.29	Ppia	1.40
	Gapdh	0.24	18S	1.06	18S	2.00	Gapdh	1.67	Hprt	4.87	1.00	Gapdh	1.55
	Hprt	0.51	Ppia	1.47	Hprt	2.06	Hprt	1.86	Ppia	7.16	1.12	Hprt	1.79
	18S	0.70	Gapdh	1.58	Gapdh	2.83	18S	2.09	Gapdh	7.39	1.38	18S	2.02
	Actb	0.91	Actb	1.89	Actb	5.00	Actb	2.35	Actb	12.93	2.23	Actb	2.38
Control	Gapdh	0.27	Gapdh	0.63	Gapdh	1.32	Gapdh	1.44	18S	1.65	0.17	Ppia	1.32
	Ppia	0.27	Ppia	0.63	Ppia	2.00	Ppia	1.45	Hprt	4.52	0.93	Gapdh	1.36
	Hprt	0.73	Hprt	1.04	Hprt	2.71	Hprt	1.66	Gapdh	5.90	1.07	Hprt	1.52
	18S	2.00	18S	1.43	18S	2.83	18S	2.31	Ppia	8.26	1.25	18S	2.16
	Actb	2.38	Actb	1.89	Actb	5.00	Actb	2.57	Actb	13.63	2.27	Actb	2.56
TGF-β	Ppia	0.47	18S	0.84	18S	1.57	Ppia	1.50	18S	3.73	0.37	Ppia	1.44
	Gapdh	0.93	Hprt	0.84	Ppia	1.73	18S	1.87	Hprt	5.13	1.06	Gapdh	1.71
	18S	1.42	Ppia	1.38	Hprt	2.38	Gapdh	1.90	Ppia	6.47	1.05	18S	1.85
	Hprt	1.75	Gapdh	1.69	Gapdh	3.13	Hprt	2.08	Gapdh	6.82	1.32	Hprt	2.02
	Actb	2.08	Actb	1.93	Actb	5.00	Actb	2.29	Actb	11.27	2.00	Actb	2.36
All, all samples.
